# Supplementary material
Source: PubMed Central journal article supplement (PMC2903668)

**Fig S1** A population of kinetochores can be found at a distance from SPBs in Noc-treated *CDC15* and *cdc15-2* cells. (A) CEN V-RFP can be found at a distance from Ndc80p-GFP in Noc-arrested cells. Cells carrying *cdc20::pMET-CDC20 NDC80-GFP CEN V-RFP* in *CDC15* (i) and *cdc15-2* (ii) backgrounds were arrested in metaphase by *cdc20*-depletion at 32°C (a). The *CEN5::tetO2X112* located 1.4kb left of *CEN V* (Tanaka et al., 2000) together with the *tetR-RFP* served as a marker for the localization of kinetochore on chromosome V and allowed us to examine the relative position of a specific kinetochore in relation to the rest of the kinetochores marked by Ndc80p-GFP. In parallel experiments, the strains were arrested in Noc 32°C (b). There appeared to be no significant difference in the percentages of cells with such kinetochores losing association in *CDC15* and *cdc15-2* cells. (B) Ndc80p-GFP can be found at a distance from Spc29p-RFP in Noc-arrested cells. Cells carrying *cdc20Δ GAL-CDC20 NDC80-GFP SPC29-RFP* in *CDC15* (i) and *cdc15-2* (ii) backgrounds were arrested in metaphase by *cdc20*-depletion at 32°C (a). In parallel experiments, the strains were arrested in Noc 32°C (b). Both the *CDC15* and *cdc15-2* strains showed that a small population of the cells exhibited weak Ncd80p-GFP signals at a distance from the Spc29p-RFP (Noc, bottom panels, and magnified regions with white arrows). This was consistent with data from a previous report (Gillett et al., 2004). (C) CEN V-GFP can be found at a distance from Spc29p-RFP in Noc-arrested cells. *cdc20Δ::GAL-CDC20 CEN V-GFP SPC29-RFP* in *CDC15* (i) and *cdc15-2* (ii) backgrounds arrested in metaphase by *cdc20*-depletion at 32°C (a). In parallel experiments, the strains were arrested in Noc 32°C (b). Similar percentages of *CDC15* and *cdc15-2* cells were found to display CEN V-GFP signals at a distance away from the Spc29p-RFP. All images were taken at the arrested stage using spinning disk confocal microscopy.

**Fig S2** CEN V-GFP drifts away from SPBs in some Noc-treated cells. Wild-type *tetR-GFP CEN5::tetO2X112 SPC29-RFP MYO1-Redstar2* cells were treated in alpha-factor and then released into Noc-containing media on slides for time-lapsed imaging. (A) In most cells, the CEN V-GFP spots were closely-associated with Spc29p-RFP (i). The tracking of Spc29p-RFP and CEN V-GFP as indicated by the pathways taken by them (ii) suggested that the SPBs and CEN V undergo dynamic movements. (B) In some cells maintained in Noc-containing media, the CEN V-GFP spots were found to move away from Spc29p-RFP (i). The tracking of lines Spc29p-RFP and CEN V-GFP are shown in (ii).

**Fig S3** Time-lapsed imaging of Mad2p-GFP in wild-type (i) and *cdc15-2* cells (ii) released from Noc arrest to YPD at 32°C as described in Fig 4. (iii) Graph shows the percentages of wild-type and *cdc15-2* cells with persistent Mad2p-GFP signals after Ndc80p-Redstar2 has separated.

**Fig S4** Time-lapsed images showing *cdc20Δ GAL-CDC20 CEN V-GFP SPC29-RFP* released from *Cdc20p*-depletion into YPD at 32°C. CEN V-GFP and Spc29p-RFP do not show oscillation through the neck as the cell separated Spc29p-RFP and CEN V-GFP.

**Fig S5** Biorientation of CEN V-GFP spots is normal in *cdc20*-arrest in *cdc15-2* cells. *cdc20Δ GAL-CDC20 CEN V-GFP SPC29-RFP* (A) and *cdc15-2 cdc20Δ GAL-CDC20 CEN V-GFP SPC29-RFP* (B) cells were arrested in YPD for 2.5 hrs at 24°C and YPD for 2.5 hrs at 32°C before being transferred into SC/Glu and imaged on the heated-stage. (C) Cell counts showing percentage of cells with biorientated CEN V-GFP. (D) and (E) close-up images of CEN V-GFP in *CDC15* and *cdc15-2* cells reveal longer distances between Spc29p-RFP in *cdc15-2* cells. (F)

Plots show the distance between Spc29p-RFP in 106 cells for each strain in the experiment as described in (A) and (B). In parallel experiments, *cdc20Δ GAL-CDC20 CEN V-GFP SPC29-RFP PDS1-HA* and *cdc15-2 cdc20Δ GAL-CDC20 CEN V-GFP SPC29-RFP PDS1-HA* cells were arrested as described in (A) and (B) and Western blot analysis performed on lysates obtained at the Cdc20p-depleted stage to determine Pds1p and Pgk1p levels.

**Fig S6** Ipl1p and Sli15p localized to *cdc15-2* cells similarly as in wild-type cells. Wild-type (i) and mutant (ii) cells carrying *IPL1-GFP MYO1-REDSTAR2* (A) and *SLI15-GFP MYO1-REDSTAR2* (B) were treated as in Fig 4.

**Fig S7** Flow-chart showing the regime for the experiment performed as described in Fig 7.

**Movie 1** Dynamic movement of Spc29p-RFP across the neck in relation to CEN V-GFP and Myo1p-Redstar2 in wild-type cell. The movie shown is of the cell described in Fig 4Ai.

**Movie 2** Dynamic movement of Spc29p-RFP across the neck in relation to CEN V-GFP and Myo1p-Redstar2 in *cdc15-2* cell. The movie shown is of the cell described in Fig 4Aii.

A

*cdc20::pMET-CDC20 NDC80-GFP CEN V-RFP*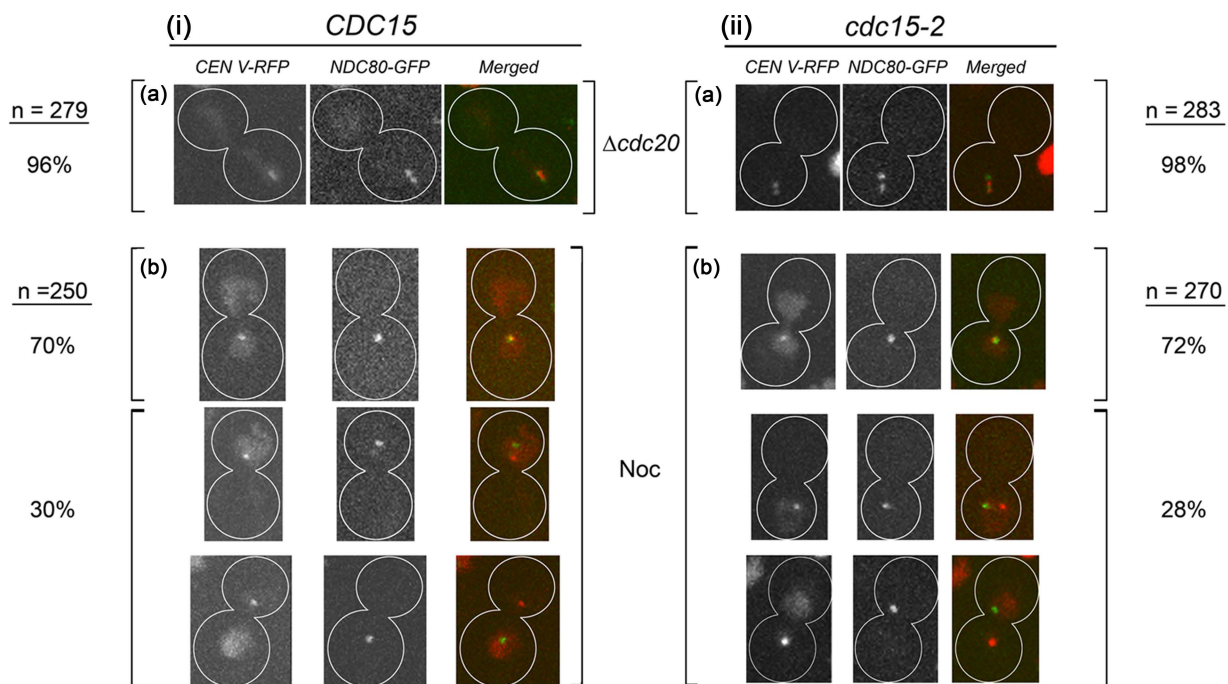

B

*cdc20 $\Delta$  GAL-CDC20 NDC80-GFP SPC29-RFP*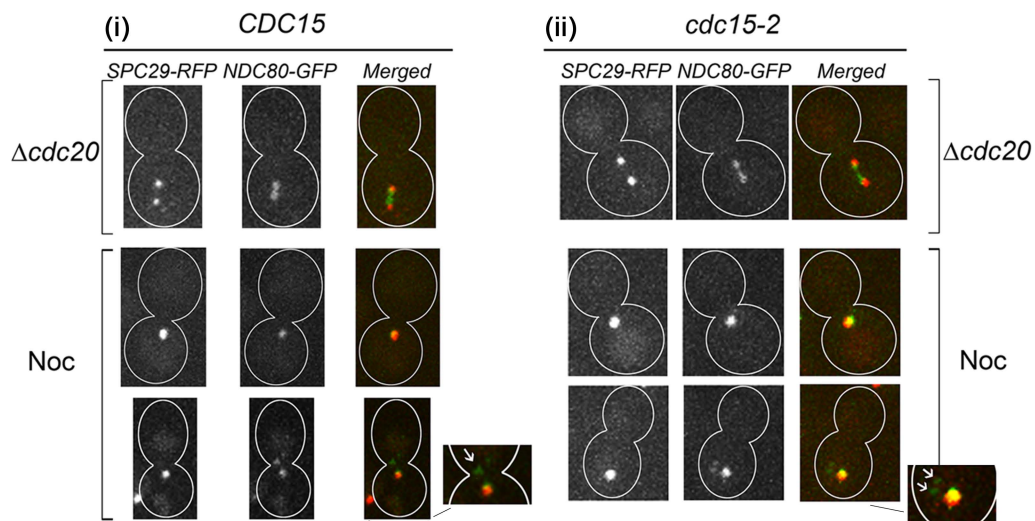

C

*cdc20 $\Delta$  GAL-CDC20 CEN V-GFP SPC29-RFP*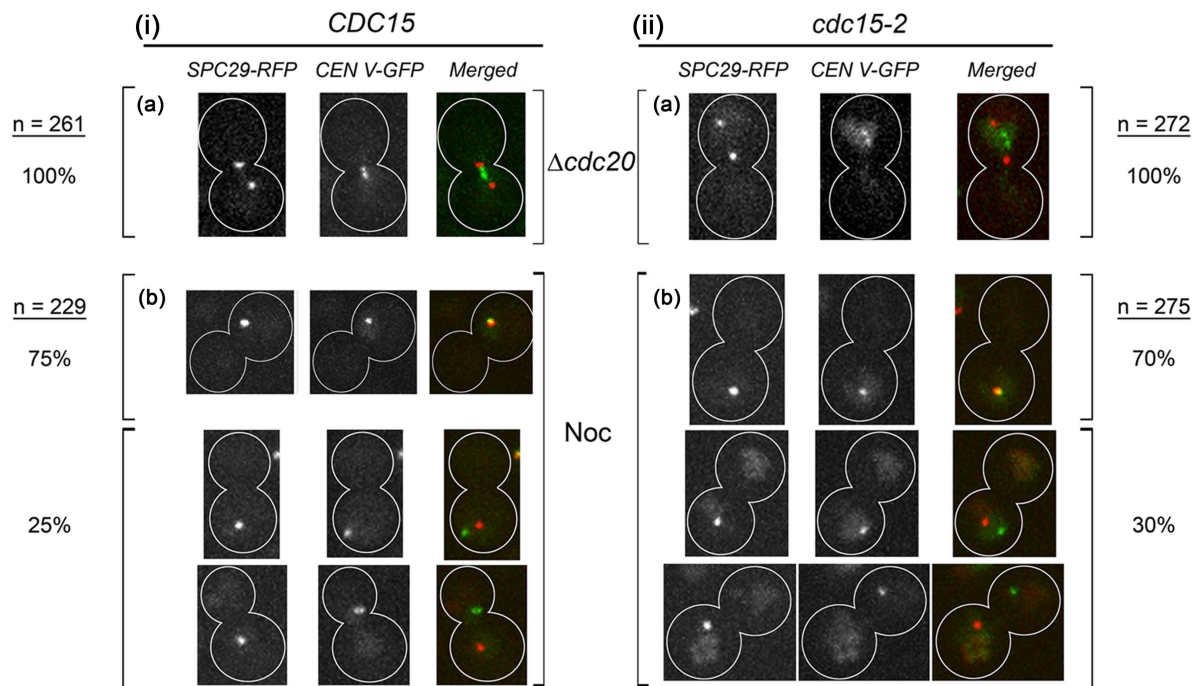

*CEN V-GFP SPC29-RFP MYO1-REDSTAR2*

$\alpha$ F arrest  $\longrightarrow$  release into YPD + Noc for 1 min  $\longrightarrow$  SC/Glu + Noc on slide for time-lapsed imaging

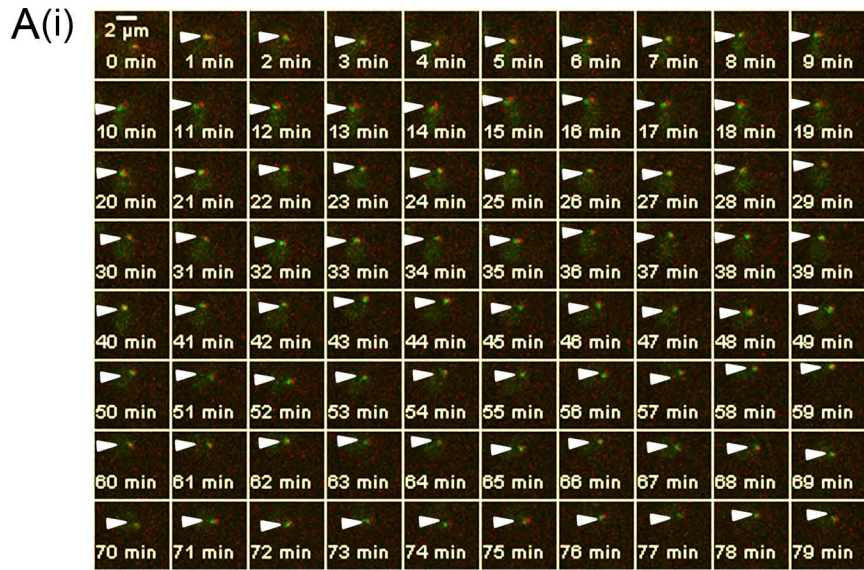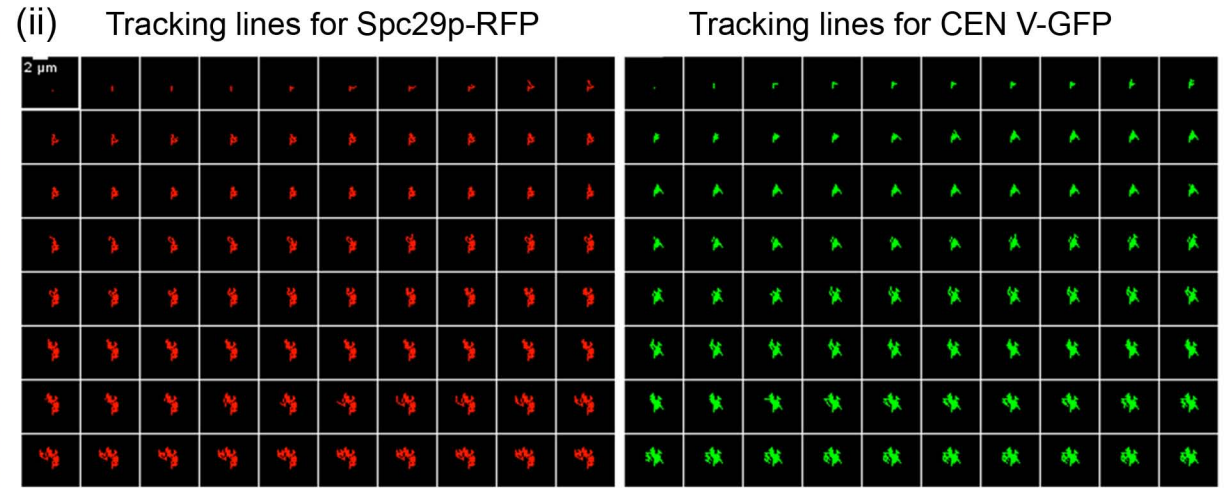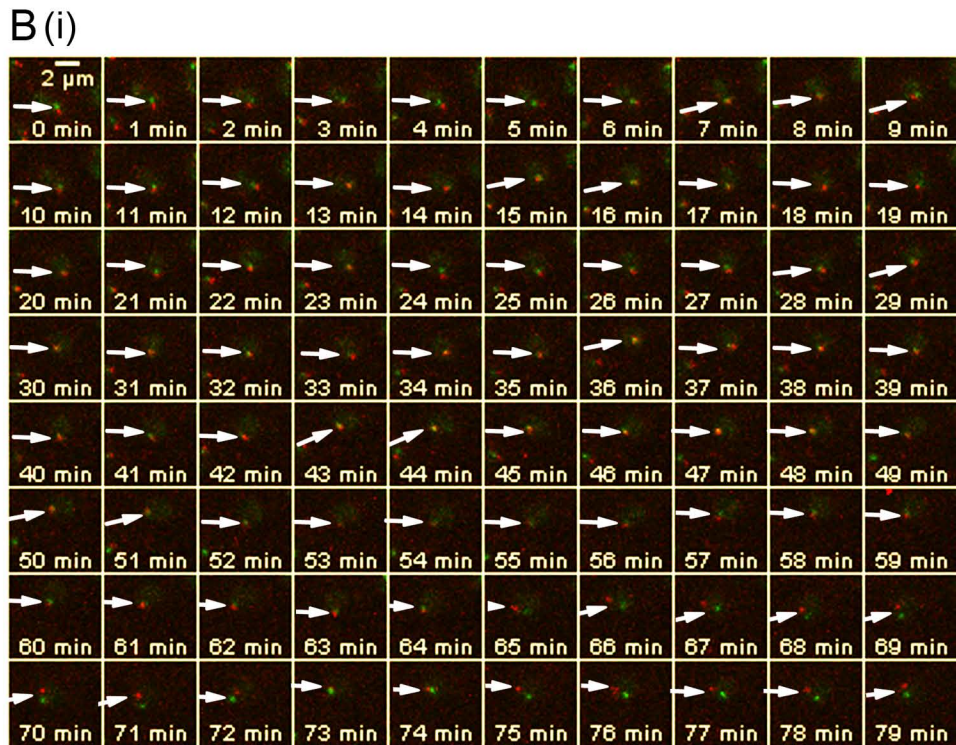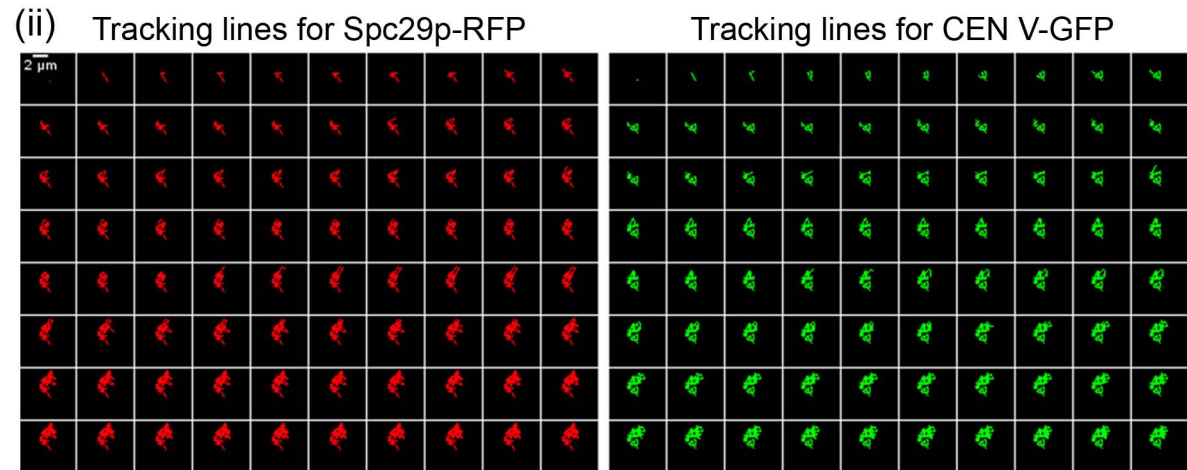

YPD + Noc, 24°C -> YPD + Noc, 32°C -> SC/Glu, 32°C (time-lapsed)

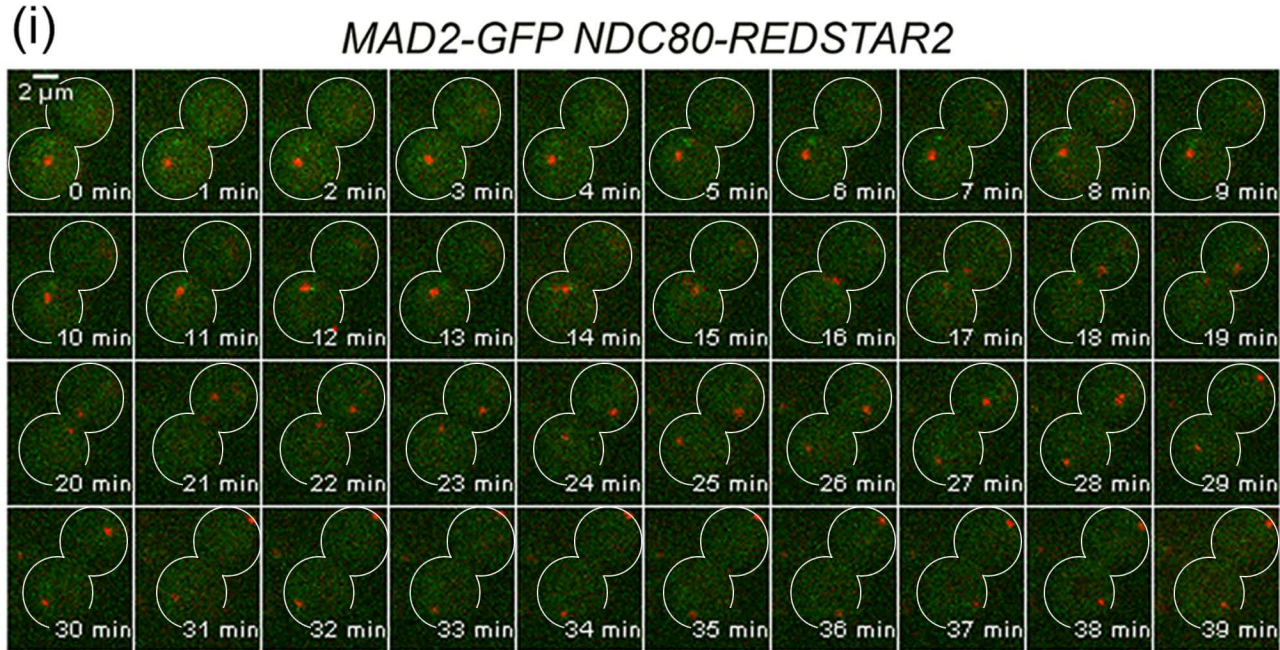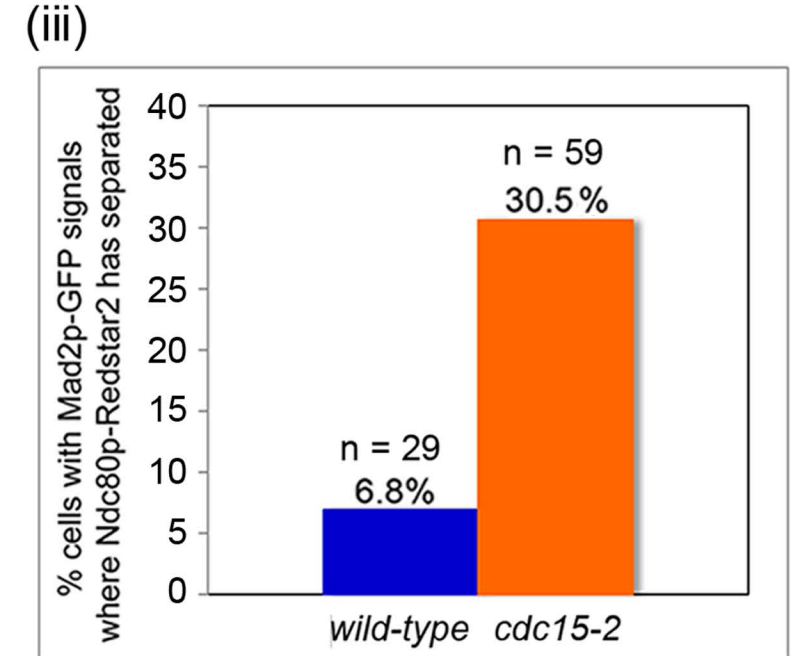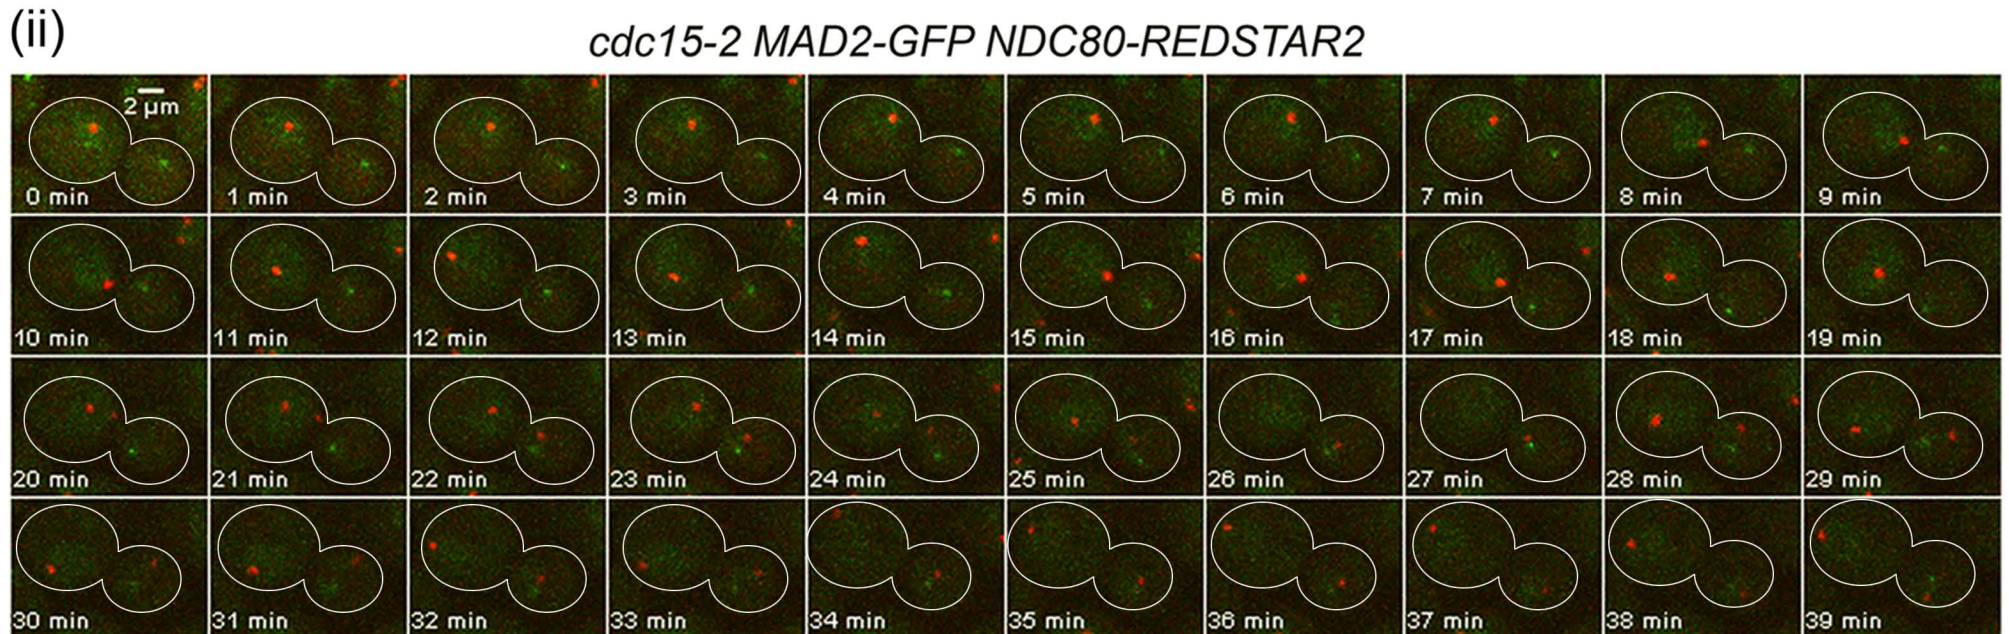

YPD arrest → release into YP/Raff/Gal  
(cdc20-depletion)

*cdc20*Δ GAL-CDC20 CEN V-GFP SPC29-RFP

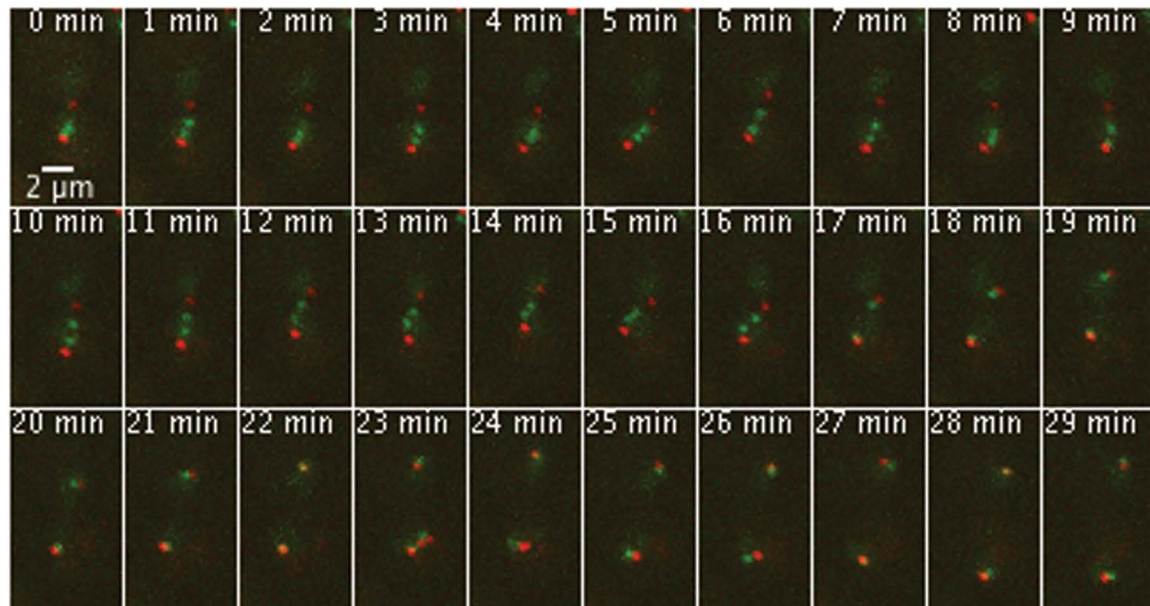

YPD, 24°C -&gt; YPD, 32°C -&gt; SC/Glu, 32°C

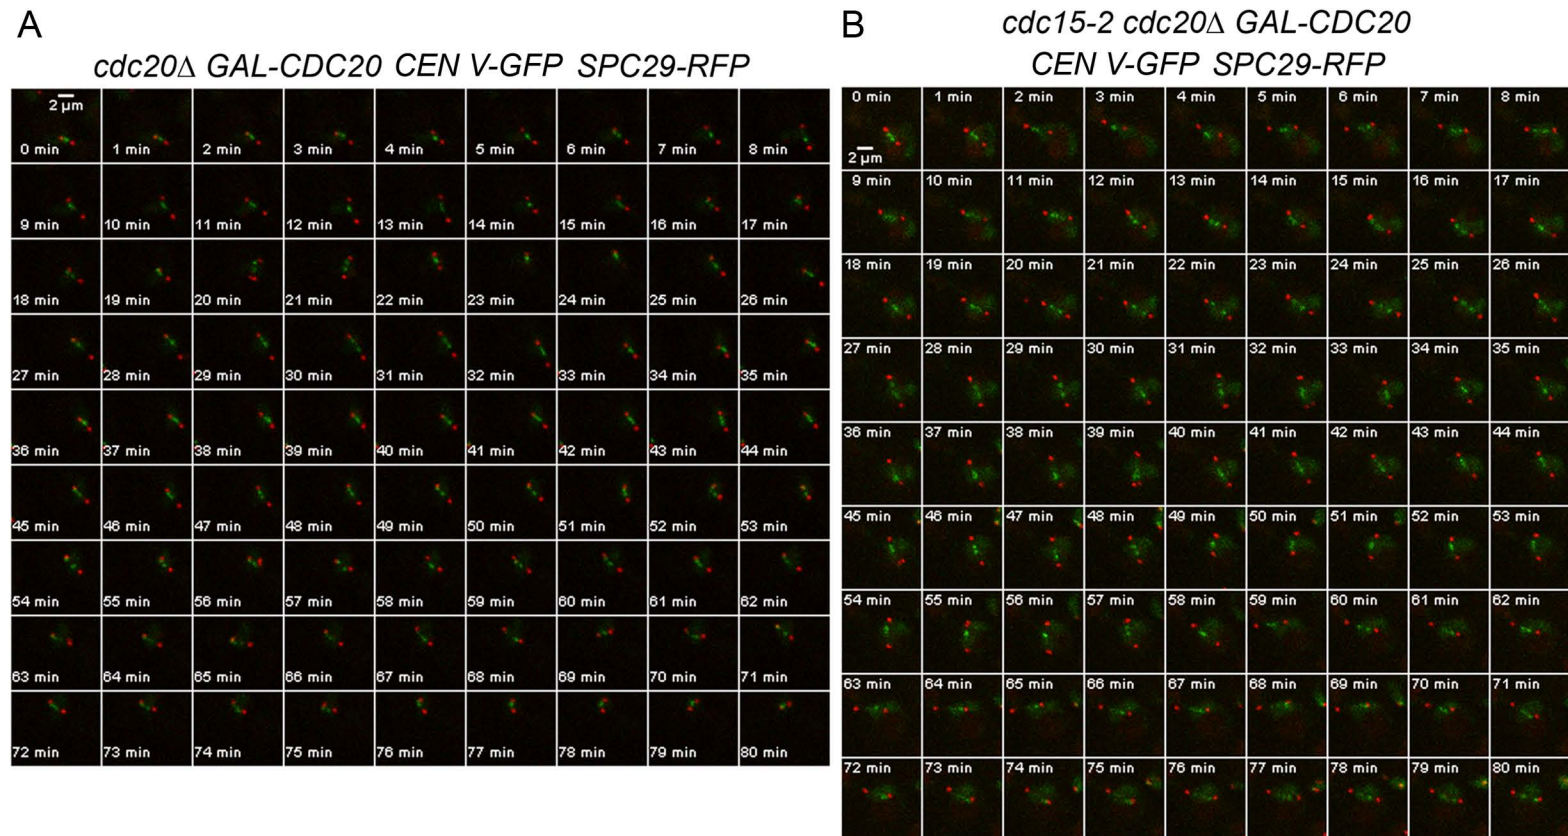

**C**

| Strain background       | % cells showing biorientation of CEN V-GFP spots |
|-------------------------|--------------------------------------------------|
| <i>CDC15</i> (n = 49)   | 100                                              |
| <i>cdc15-2</i> (n = 44) | 97.7                                             |

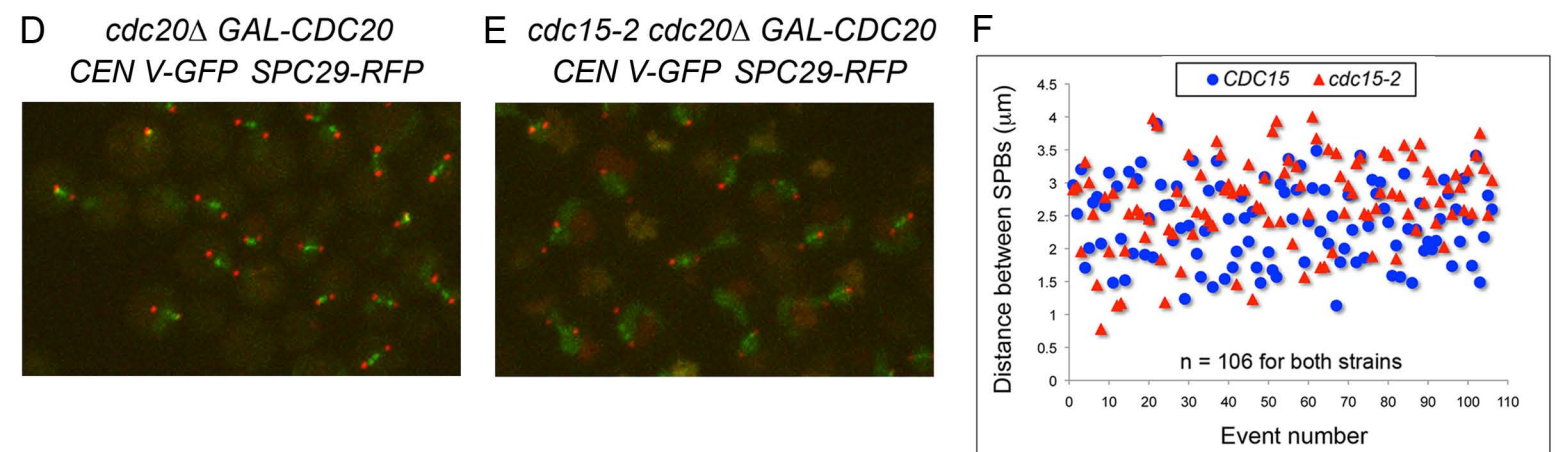

**G** YPD, 24°C -> YPD, 32°C

*cdc20Δ GAL-CDC20 CEN V-GFP SPC29-RFP PDS1-HA*

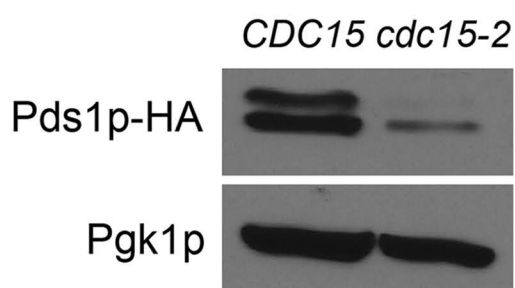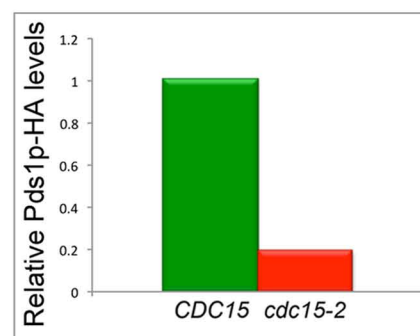

A

(i)

*IPL1-GFP MYO1-REDSTAR2*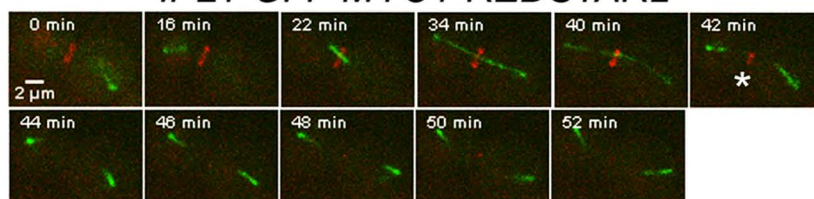

(ii)

*cdc15-2 IPL1-GFP MYO1-REDSTAR2*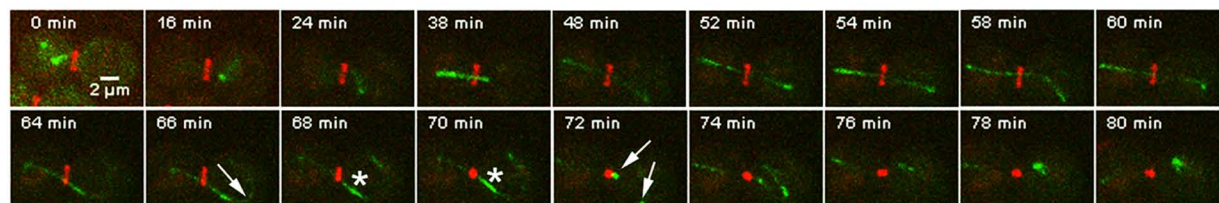

B

(i)

*SLI15-GFP MYO1-REDSTAR2*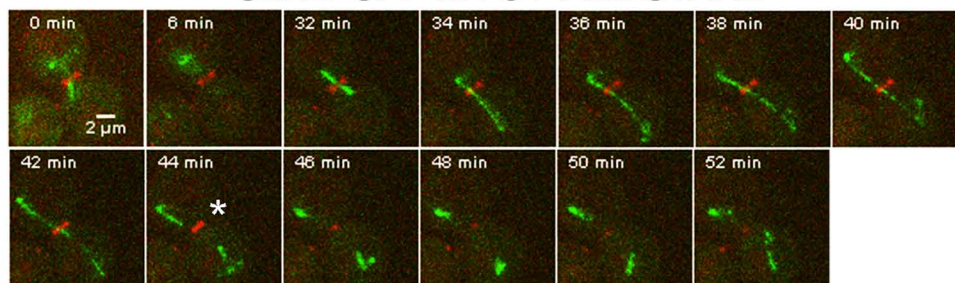

(ii)

*cdc15-2 SLI15-GFP MYO1-REDSTAR2*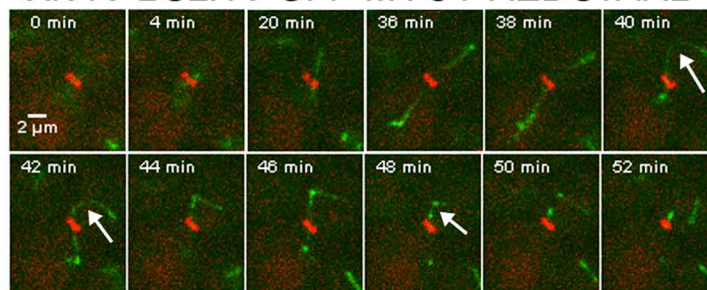



*cdc15-2 pMET-PDS1-myc CEN V-GFP SP29-RFP MYO1-Redstar2*

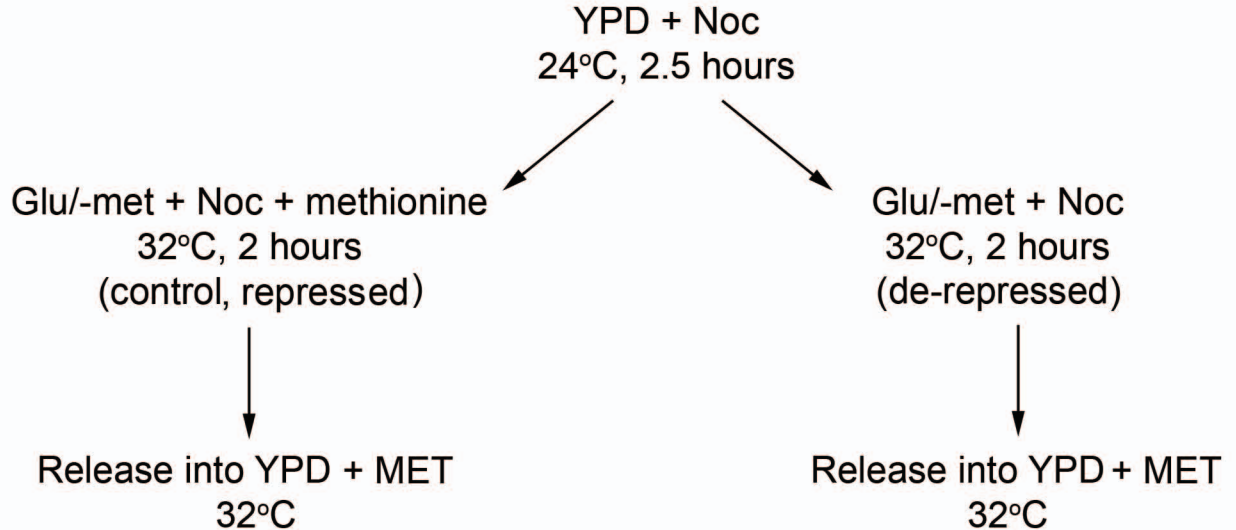

Supplement: E09-07-0637_1.pdf [file E09-07-0637_1.pdf]
